# Supplementary material for: Broad luminescence tuning in Mn2+-doped Rb2Zn3(P2O7)2via doping level control based on multiple synergies
Source: Royal Society of Chemistry journal article supplement (doi:10.1039/d2ce00719c), 2022-01-01
Supplement: d2ce00719c1.pdf [file d2ce00719c1.pdf]

**Electronic Supplementary Information (ESI†)**

**Broad luminescence tuning in Mn<sup>2+</sup>-doped Rb<sub>2</sub>Zn<sub>3</sub>(P<sub>2</sub>O<sub>7</sub>)<sub>2</sub> via doping level control based on multiple synergies**

Qin Liu,<sup>a,b</sup> Peipei Dang,<sup>a</sup> Guodong Zhang,<sup>a,b</sup> Hongzhou Lian,<sup>a</sup> Guogang Li,<sup>\*c,d</sup> Maxim S. Molokeev,<sup>e,f,g</sup> Ziyong Cheng,<sup>\*a,b</sup> Jun Lin<sup>\*a,b</sup>

<sup>a</sup>State Key Laboratory of Rare Earth Resource Utilization, Changchun Institute of Applied Chemistry, Chinese Academy of Sciences, Changchun 130022, P. R. China

<sup>b</sup>School of Applied Chemistry and Engineering, University of Science and Technology of China, Hefei 230026, P.R. China

<sup>c</sup>Faculty of Materials Science and Chemistry, China University of Geosciences, Wuhan 430074, P. R. China

<sup>d</sup>Zhejiang Institute, China University of Geosciences, Hangzhou, 311305, P. R. China

<sup>e</sup>Laboratory of Crystal Physics, Kirensky Institute of Physics, Federal Research Center KSC SB RAS, Krasnoyarsk 660036, Russia

<sup>f</sup>Department of Engineering Physics and Radioelectronics, Siberian Federal University, Krasnoyarsk 660041, Russia

<sup>g</sup>Department of Physics, Far Eastern State Transport University, Khabarovsk 680021, Russia

\*Corresponding Authors: [ggli@cug.edu.cn](mailto:ggli@cug.edu.cn); [zycheng@ciac.ac.cn](mailto:zycheng@ciac.ac.cn); [jlin@ciac.ac.cn](mailto:jlin@ciac.ac.cn)

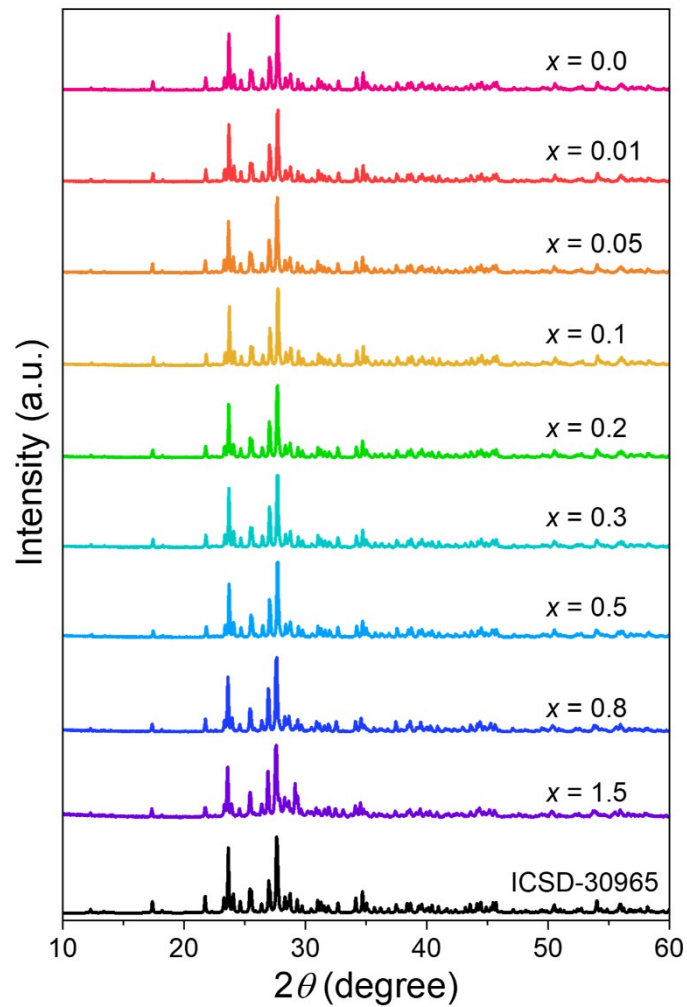

**Fig S1.** The XRD patterns at  $2\theta = 10^\circ\text{--}60^\circ$  of  $\text{Rb}_2\text{Zn}_{3-x}(\text{P}_2\text{O}_7)_2 \cdot x\text{Mn}^{2+}$  ( $x = 0, 0.01, 0.05, 0.1, 0.2, 0.3, 0.5, 0.8, 1.5$ ) samples.

**Table S1.** Fractional atomic coordinates and isotropic displacement parameters ( $\text{\AA}^2$ ) of  $\text{Rb}_2\text{Zn}_{3-x}(\text{P}_2\text{O}_7)_2:x\text{Mn}^{2+}$  samples.

| Atom       | $x$         | $y$        | $z$        | $B_{\text{iso}}$ | $Occ.$ |
|------------|-------------|------------|------------|------------------|--------|
| $x = 0$    |             |            |            |                  |        |
| Rb1        | 0.09465(19) | 0.4941(8)  | 0.3890(4)  | 2.38(10)         | 1      |
| Rb2        | 0.41730(18) | 0.2505(6)  | 0.9489(4)  | 1.91(10)         | 1      |
| Zn1        | 0.0983(2)   | 0          | 0.2082(5)  | 1.37(10)         | 1      |
| Zn2        | 0.2623(2)   | 0.6190(7)  | 0.7937(5)  | 1.60(11)         | 1      |
| Zn3        | 0.3871(2)   | 0.0888(7)  | 0.4533(5)  | 1.86(12)         | 1      |
| P1         | 0.3856(5)   | 0.5142(13) | 0.4332(10) | 1.01(17)         | 1      |
| P2         | 0.3126(6)   | 0.7899(13) | 0.1598(11) | 1.8(2)           | 1      |
| P3         | 0.1832(5)   | 0.9839(12) | 0.6394(10) | 0.95(18)         | 1      |
| P4         | 0.1034(5)   | 0.2809(12) | 0.8851(10) | 1.13(19)         | 1      |
| O1         | 0.3642(10)  | 0.528(2)   | 0.628(2)   | 1.54(14)         | 1      |
| O2         | 0.4888(11)  | 0.589(2)   | 0.418(2)   | 1.54(14)         | 1      |
| O3         | 0.3705(11)  | 0.330(2)   | 0.332(2)   | 1.54(14)         | 1      |
| O4         | 0.3113(11)  | 0.654(2)   | 0.325(2)   | 1.54(14)         | 1      |
| O5         | 0.1975(12)  | 0.840(2)   | 0.122(2)   | 1.54(14)         | 1      |
| O6         | 0.3836(11)  | 0.954(2)   | 0.210(2)   | 1.54(14)         | 1      |
| O7         | 0.3493(12)  | 0.6800(19) | 0.014(2)   | 1.54(14)         | 1      |
| O8         | 0.1677(9)   | 0.779(3)   | 0.665(2)   | 1.54(14)         | 1      |
| O9         | 0.1291(11)  | 0.075(2)   | 0.473(2)   | 1.54(14)         | 1      |
| O10        | 0.2989(10)  | 0.039(2)   | 0.634(2)   | 1.54(14)         | 1      |
| O11        | 0.1310(9)   | 0.072(2)   | 0.8199(19) | 1.54(14)         | 1      |
| O12        | 0.0193(12)  | 0.3510(19) | 0.763(2)   | 1.54(14)         | 1      |
| O13        | 0.0862(11)  | 0.230(2)   | 0.089(2)   | 1.54(14)         | 1      |
| O14        | 0.2003(11)  | 0.400(2)   | 0.887(2)   | 1.54(14)         | 1      |
| $x = 0.01$ |             |            |            |                  |        |
| Rb1        | 0.0951(2)   | 0.4941(8)  | 0.3886(4)  | 1.90(11)         | 1      |
| Rb2        | 0.4164(2)   | 0.2518(7)  | 0.9487(4)  | 1.66(10)         | 1      |
| Zn1        | 0.0985(3)   | 0          | 0.2092(5)  | 1.43(11)         | 1      |
| Zn2        | 0.2625(3)   | 0.6201(8)  | 0.7933(5)  | 1.55(13)         | 1      |
| Zn3        | 0.3864(3)   | 0.0902(8)  | 0.4541(6)  | 1.32(12)         | 1      |

|           |            |            |            |          |   |
|-----------|------------|------------|------------|----------|---|
| P1        | 0.3870(6)  | 0.5175(14) | 0.4340(11) | 0.58(18) | 1 |
| P2        | 0.3128(6)  | 0.7910(14) | 0.1534(12) | 1.9(2)   | 1 |
| P3        | 0.1830(6)  | 0.9862(14) | 0.6369(11) | 0.92(19) | 1 |
| P4        | 0.1052(6)  | 0.2778(13) | 0.8845(11) | 1.2(2)   | 1 |
| O1        | 0.3673(11) | 0.527(2)   | 0.624(2)   | 1.23(15) | 1 |
| O2        | 0.4889(11) | 0.587(2)   | 0.418(2)   | 1.23(15) | 1 |
| O3        | 0.3695(12) | 0.333(2)   | 0.339(3)   | 1.23(15) | 1 |
| O4        | 0.3100(11) | 0.652(2)   | 0.323(2)   | 1.23(15) | 1 |
| O5        | 0.2016(12) | 0.843(2)   | 0.116(2)   | 1.23(15) | 1 |
| O6        | 0.3799(12) | 0.957(2)   | 0.214(2)   | 1.23(15) | 1 |
| O7        | 0.3526(13) | 0.674(2)   | 0.004(2)   | 1.23(15) | 1 |
| O8        | 0.1626(10) | 0.781(3)   | 0.666(2)   | 1.23(15) | 1 |
| O9        | 0.1281(11) | 0.071(2)   | 0.469(2)   | 1.23(15) | 1 |
| O10       | 0.2982(11) | 0.040(2)   | 0.634(2)   | 1.23(15) | 1 |
| O11       | 0.1330(10) | 0.077(2)   | 0.818(2)   | 1.23(15) | 1 |
| O12       | 0.0201(13) | 0.351(2)   | 0.766(2)   | 1.23(15) | 1 |
| O13       | 0.0853(12) | 0.228(2)   | 0.095(3)   | 1.23(15) | 1 |
| O14       | 0.1921(12) | 0.391(2)   | 0.869(2)   | 1.23(15) | 1 |
| $x = 0.1$ |            |            |            |          |   |
| Rb1       | 0.0950(2)  | 0.4930(8)  | 0.3891(4)  | 2.33(12) | 1 |
| Rb2       | 0.4171(2)  | 0.2486(7)  | 0.9498(4)  | 1.93(11) | 1 |
| Zn1       | 0.0990(3)  | 0          | 0.2080(5)  | 1.53(12) | 1 |
| Zn2       | 0.2623(3)  | 0.6192(8)  | 0.7923(5)  | 1.87(13) | 1 |
| Zn3       | 0.3872(3)  | 0.0871(8)  | 0.4547(6)  | 1.83(13) | 1 |
| P1        | 0.3856(6)  | 0.5143(14) | 0.4332(12) | 1.03(19) | 1 |
| P2        | 0.3127(6)  | 0.7915(15) | 0.1577(12) | 2.0(2)   | 1 |
| P3        | 0.1830(6)  | 0.9839(14) | 0.6373(12) | 1.3(2)   | 1 |
| P4        | 0.1037(6)  | 0.2803(13) | 0.8863(11) | 1.2(2)   | 1 |
| O1        | 0.3714(11) | 0.527(3)   | 0.625(2)   | 1.84(16) | 1 |
| O2        | 0.4879(12) | 0.578(2)   | 0.416(2)   | 1.84(16) | 1 |
| O3        | 0.3701(12) | 0.333(2)   | 0.329(3)   | 1.84(16) | 1 |
| O4        | 0.3141(11) | 0.648(2)   | 0.329(2)   | 1.84(16) | 1 |
| O5        | 0.2035(13) | 0.835(2)   | 0.123(2)   | 1.84(16) | 1 |
| O6        | 0.3830(12) | 0.947(2)   | 0.208(2)   | 1.84(16) | 1 |

|     |            |          |          |          |   |
|-----|------------|----------|----------|----------|---|
| O7  | 0.3506(13) | 0.679(2) | 0.017(2) | 1.84(16) | 1 |
| O8  | 0.1642(10) | 0.778(3) | 0.657(2) | 1.84(16) | 1 |
| O9  | 0.1270(12) | 0.068(2) | 0.468(2) | 1.84(16) | 1 |
| O10 | 0.2981(11) | 0.037(2) | 0.641(2) | 1.84(16) | 1 |
| O11 | 0.1310(10) | 0.072(2) | 0.817(2) | 1.84(16) | 1 |
| O12 | 0.0161(13) | 0.355(2) | 0.773(3) | 1.84(16) | 1 |
| O13 | 0.0890(12) | 0.226(3) | 0.095(3) | 1.84(16) | 1 |
| O14 | 0.1977(12) | 0.388(2) | 0.880(3) | 1.84(16) | 1 |

---

$x = 0.2$

---

|     |             |            |            |          |   |
|-----|-------------|------------|------------|----------|---|
| Rb1 | 0.09540(19) | 0.4950(8)  | 0.3879(4)  | 2.52(11) | 1 |
| Rb2 | 0.41678(19) | 0.2519(6)  | 0.9486(4)  | 1.91(10) | 1 |
| Zn1 | 0.0989(2)   | 0          | 0.2061(5)  | 1.66(11) | 1 |
| Zn2 | 0.2617(3)   | 0.6216(7)  | 0.7934(5)  | 2.02(13) | 1 |
| Zn3 | 0.3879(2)   | 0.0905(7)  | 0.4548(6)  | 1.79(13) | 1 |
| P1  | 0.3859(6)   | 0.5156(13) | 0.4351(11) | 1.20(18) | 1 |
| P2  | 0.3128(6)   | 0.7909(13) | 0.1596(11) | 1.5(2)   | 1 |
| P3  | 0.1828(5)   | 0.9874(12) | 0.6368(11) | 0.98(18) | 1 |
| P4  | 0.1033(5)   | 0.2821(12) | 0.8862(10) | 1.2(2)   | 1 |

|     |            |            |          |          |   |
|-----|------------|------------|----------|----------|---|
| O1  | 0.3662(10) | 0.526(2)   | 0.623(2) | 1.52(14) | 1 |
| O2  | 0.4877(11) | 0.583(2)   | 0.413(2) | 1.52(14) | 1 |
| O3  | 0.3679(11) | 0.333(2)   | 0.331(2) | 1.52(14) | 1 |
| O4  | 0.3151(11) | 0.651(2)   | 0.325(2) | 1.52(14) | 1 |
| O5  | 0.2023(12) | 0.838(2)   | 0.122(2) | 1.52(14) | 1 |
| O6  | 0.3816(11) | 0.948(2)   | 0.217(2) | 1.52(14) | 1 |
| O7  | 0.3504(12) | 0.6838(19) | 0.009(2) | 1.52(14) | 1 |
| O8  | 0.1651(9)  | 0.779(3)   | 0.656(2) | 1.52(14) | 1 |
| O9  | 0.1263(11) | 0.072(2)   | 0.465(2) | 1.52(14) | 1 |
| O10 | 0.2989(11) | 0.041(2)   | 0.633(2) | 1.52(14) | 1 |
| O11 | 0.1327(9)  | 0.068(2)   | 0.822(2) | 1.52(14) | 1 |
| O12 | 0.0155(12) | 0.3578(19) | 0.766(2) | 1.52(14) | 1 |
| O13 | 0.0879(11) | 0.233(2)   | 0.088(2) | 1.52(14) | 1 |
| O14 | 0.1978(11) | 0.395(2)   | 0.882(2) | 1.52(14) | 1 |

---

$x = 0.3$

---

|     |           |           |           |          |   |
|-----|-----------|-----------|-----------|----------|---|
| Rb1 | 0.0952(2) | 0.4944(8) | 0.3886(4) | 2.97(13) | 1 |
|-----|-----------|-----------|-----------|----------|---|

|                       |            |            |            |          |   |
|-----------------------|------------|------------|------------|----------|---|
| Rb2                   | 0.4167(2)  | 0.2506(7)  | 0.9486(4)  | 2.02(11) | 1 |
| Zn1                   | 0.0993(3)  | 0          | 0.2063(5)  | 2.07(12) | 1 |
| Zn2                   | 0.2617(3)  | 0.6201(8)  | 0.7926(5)  | 2.62(14) | 1 |
| Zn3                   | 0.3870(3)  | 0.0885(8)  | 0.4549(6)  | 2.41(14) | 1 |
| P1                    | 0.3852(6)  | 0.5147(14) | 0.4351(12) | 1.19(19) | 1 |
| P2                    | 0.3139(6)  | 0.7915(14) | 0.1607(12) | 2.0(2)   | 1 |
| P3                    | 0.1829(5)  | 0.9865(13) | 0.6354(11) | 0.92(19) | 1 |
| P4                    | 0.0999(6)  | 0.2825(13) | 0.8813(11) | 1.5(2)   | 1 |
| O1                    | 0.3707(11) | 0.533(2)   | 0.628(2)   | 1.90(15) | 1 |
| O2                    | 0.4866(12) | 0.578(2)   | 0.415(2)   | 1.90(15) | 1 |
| O3                    | 0.3711(12) | 0.332(2)   | 0.334(3)   | 1.90(15) | 1 |
| O4                    | 0.3143(11) | 0.657(2)   | 0.323(2)   | 1.90(15) | 1 |
| O5                    | 0.2038(13) | 0.843(2)   | 0.125(2)   | 1.90(15) | 1 |
| O6                    | 0.3794(12) | 0.948(2)   | 0.220(2)   | 1.90(15) | 1 |
| O7                    | 0.3484(13) | 0.678(2)   | 0.010(2)   | 1.90(15) | 1 |
| O8                    | 0.1662(10) | 0.781(3)   | 0.659(2)   | 1.90(15) | 1 |
| O9                    | 0.1251(11) | 0.075(2)   | 0.463(2)   | 1.90(15) | 1 |
| O10                   | 0.2948(11) | 0.037(2)   | 0.628(2)   | 1.90(15) | 1 |
| O11                   | 0.1331(10) | 0.071(2)   | 0.820(2)   | 1.90(15) | 1 |
| O12                   | 0.0157(13) | 0.354(2)   | 0.769(3)   | 1.90(15) | 1 |
| O13                   | 0.0913(12) | 0.227(2)   | 0.097(3)   | 1.90(15) | 1 |
| O14                   | 0.1965(11) | 0.394(2)   | 0.878(2)   | 1.90(15) | 1 |
| <hr/> $x = 0.5$ <hr/> |            |            |            |          |   |
| Rb1                   | 0.0950(2)  | 0.4951(8)  | 0.3877(4)  | 2.63(12) | 1 |
| Rb2                   | 0.4163(2)  | 0.2513(7)  | 0.9487(4)  | 1.77(10) | 1 |
| Zn1                   | 0.1002(3)  | 0          | 0.2060(5)  | 1.84(12) | 1 |
| Zn2                   | 0.2626(3)  | 0.6218(8)  | 0.7936(6)  | 2.82(14) | 1 |
| Zn3                   | 0.3877(3)  | 0.0882(8)  | 0.4562(6)  | 1.95(14) | 1 |
| <hr/>                 |            |            |            |          |   |
| P1                    | 0.3856(6)  | 0.5128(14) | 0.4342(11) | 0.62(17) | 1 |
| P2                    | 0.3128(6)  | 0.7882(14) | 0.1596(11) | 1.6(2)   | 1 |
| P3                    | 0.1818(6)  | 0.9840(14) | 0.6382(12) | 1.6(2)   | 1 |
| P4                    | 0.1033(6)  | 0.2799(13) | 0.8820(11) | 1.3(2)   | 1 |
| O1                    | 0.3741(11) | 0.536(2)   | 0.628(2)   | 1.86(15) | 1 |
| O2                    | 0.4874(12) | 0.581(2)   | 0.412(2)   | 1.86(15) | 1 |

|     |            |          |          |          |   |
|-----|------------|----------|----------|----------|---|
| O3  | 0.3705(12) | 0.334(2) | 0.326(3) | 1.86(15) | 1 |
| O4  | 0.3149(12) | 0.650(2) | 0.328(2) | 1.86(15) | 1 |
| O5  | 0.2059(13) | 0.834(2) | 0.118(2) | 1.86(15) | 1 |
| O6  | 0.3824(12) | 0.957(3) | 0.208(2) | 1.86(15) | 1 |
| O7  | 0.3498(13) | 0.678(2) | 0.004(2) | 1.86(15) | 1 |
| O8  | 0.1608(10) | 0.779(3) | 0.651(2) | 1.86(15) | 1 |
| O9  | 0.1263(11) | 0.067(2) | 0.460(2) | 1.86(15) | 1 |
| O10 | 0.2954(11) | 0.033(2) | 0.634(2) | 1.86(15) | 1 |
| O11 | 0.1279(10) | 0.076(2) | 0.814(2) | 1.86(15) | 1 |
| O12 | 0.0228(13) | 0.355(2) | 0.770(3) | 1.86(15) | 1 |
| O13 | 0.0919(12) | 0.242(3) | 0.087(2) | 1.86(15) | 1 |
| O14 | 0.1962(12) | 0.385(2) | 0.865(2) | 1.86(15) | 1 |

---

**Table S2.** Main parameters of processing and refinement of the  $\text{Rb}_2\text{Zn}_{3-x}(\text{P}_2\text{O}_7)_2:x\text{Mn}^{2+}$  samples.

| $x$  | Space Group | Cell parameters (Å),<br>Cell Volume (Å <sup>3</sup> )                                                            | $R_{\text{wp}}$ , $R_{\text{p}}$ , $R_{\text{B}}$ , $\chi^2$ |
|------|-------------|------------------------------------------------------------------------------------------------------------------|--------------------------------------------------------------|
| 0    | $P2_1$      | $a = 13.2173(2)$ ,<br>$b = 7.22254(11)$ ,<br>$c = 7.19891(12)$ ,<br>$\beta = 92.0270(7)$ ,<br>$V = 686.796(19)$  | 4.98, 3.6, 1.1,<br>1.94                                      |
| 0.01 | $P2_1$      | $a = 13.21710(16)$ ,<br>$b = 7.22270(8)$ ,<br>$c = 7.19871(9)$ ,<br>$\beta = 92.0363(7)$ ,<br>$V = 686.777(14)$  | 5.34, 4.0, 1.34,<br>1.9                                      |
| 0.1  | $P2_1$      | $a = 13.22128(14)$ ,<br>$b = 7.22530(8)$ ,<br>$c = 7.20117(8)$ ,<br>$\beta = 91.9919(7)$ ,<br>$V = 687.495(13)$  | 5.53, 4.05, 1.42,<br>2.14                                    |
| 0.2  | $P2_1$      | $a = 13.22466(16)$ ,<br>$b = 7.22804(9)$ ,<br>$c = 7.20359(9)$ ,<br>$\beta = 91.9457(7)$ ,<br>$V = 688.183(15)$  | 5.19, 3.81, 1.23,<br>2.06                                    |
| 0.3  | $P2_1$      | $a = 13.22779(18)$ ,<br>$b = 7.23029(9)$ ,<br>$c = 7.20518(10)$ ,<br>$\beta = 91.9146(8)$ ,<br>$V = 688.724(16)$ | 5.32, 3.87, 1.44,<br>2.04                                    |
| 0.5  | $P2_1$      | $a = 13.23571(16)$ ,<br>$b = 7.23557(9)$ ,<br>$c = 7.20872(8)$ ,<br>$\beta = 91.8553(8)$ ,<br>$V = 690.002(14)$  | 5.16, 3.9, 1.38,<br>1.84                                     |



**Table S3.** Main bond lengths (Å) of  $\text{Rb}_2\text{Zn}_{3-x}(\text{P}_2\text{O}_7)_2:x\text{Mn}^{2+}$  samples.

| $x = 0$    |           |         |           |
|------------|-----------|---------|-----------|
| Rb1—O4     | 3.137(14) | Rb1—O8  | 2.996(19) |
| Rb1—O9     | 3.117(16) | Rb1—O12 | 3.082(15) |
| Rb1—O12    | 3.161(15) | Rb1—O13 | 2.881(15) |
| Rb2—O1     | 3.120(15) | Rb2—O2  | 3.179(15) |
| Rb2—O3     | 2.905(15) | Rb2—O6  | 2.894(15) |
| Rb2—O7     | 3.129(15) | Rb2—O10 | 3.110(14) |
| Rb2—O14    | 3.082(14) | Zn1—O5  | 1.870(15) |
| Zn1—O9     | 2.010(15) | Zn1—O11 | 2.891(14) |
| Zn1—O12    | 1.908(15) | Zn1—O13 | 1.874(15) |
| Zn2—O1     | 1.945(14) | Zn2—O5  | 3.002(15) |
| Zn2—O7     | 1.975(15) | Zn2—O8  | 1.917(17) |
| Zn2—O14    | 1.914(15) | Zn3—O2  | 1.855(14) |
| Zn3—O3     | 1.958(15) | Zn3—O6  | 2.003(15) |
| Zn3—O10    | 1.813(14) | P1—O1   | 1.444(16) |
| P1—O2      | 1.475(16) | P1—O3   | 1.527(17) |
| P1—O4      | 1.593(16) | P2—O4   | 1.543(17) |
| P2—O5      | 1.578(17) | P2—O6   | 1.547(17) |
| P2—O7      | 1.415(17) | P3—O8   | 1.506(23) |
| P3—O9      | 1.523(16) | P3—O10  | 1.582(14) |
| P3—O11     | 1.623(15) | P4—O11  | 1.625(17) |
| P4—O12     | 1.482(16) | P4—O13  | 1.538(16) |
| P4—O14     | 1.542(16) |         |           |
| $x = 0.01$ |           |         |           |
| Rb1—O4     | 3.112(14) | Rb1—O8  | 2.992(19) |
| Rb1—O9     | 3.138(16) | Rb1—O12 | 3.102(15) |
| Rb1—O12    | 3.175(16) | Rb1—O13 | 2.856(19) |
| Rb2—O1     | 3.119(15) | Rb2—O2  | 3.192(15) |
| Rb2—O3     | 2.957(21) | Rb2—O6  | 2.912(15) |

|         |           |         |           |
|---------|-----------|---------|-----------|
| Rb2—O7  | 3.193(15) | Rb2—O7  | 3.111(17) |
| Rb2—O10 | 3.108(15) | Rb2—O14 | 3.164(16) |
| Zn1—O5  | 1.913(15) | Zn1—O9  | 1.965(15) |
| Zn1—O11 | 2.922(15) | Zn1—O12 | 1.915(16) |
| Zn1—O13 | 1.846(16) | Zn2—O1  | 1.994(15) |
| Zn2—O5  | 2.961(15) | Zn2—O7  | 1.934(16) |
| Zn2—O8  | 1.962(17) | Zn2—O14 | 1.984(16) |
| Zn3—O2  | 1.859(15) | Zn3—O3  | 1.949(17) |
| Zn3—O6  | 1.977(15) | Zn3—O10 | 1.810(15) |
| P1—O1   | 1.403(16) | P1—O2   | 1.446(16) |
| P1—O3   | 1.512(19) | P1—O4   | 1.600(17) |
| P2—O4   | 1.582(17) | P2—O5   | 1.532(17) |
| P2—O6   | 1.545(17) | P2—O7   | 1.479(17) |
| P3—O8   | 1.522(24) | P3—O9   | 1.517(17) |
| P3—O10  | 1.572(16) | P3—O11  | 1.621(16) |
| P4—O11  | 1.575(17) | P4—O12  | 1.485(18) |
| P4—O13  | 1.588(23) | P4—O14  | 1.417(17) |

---

$x = 0.1$

---

|         |           |         |           |
|---------|-----------|---------|-----------|
| Rb1—O4  | 3.150(14) | Rb1—O8  | 2.946(19) |
| Rb1—O9  | 3.149(16) | Rb1—O9  | 3.190(15) |
| Rb1—O12 | 3.150(21) | Rb1—O13 | 2.864(22) |
| Rb2—O1  | 3.128(18) | Rb2—O3  | 2.887(21) |
| Rb2—O6  | 2.910(15) | Rb2—O7  | 3.113(17) |
| Rb2—O10 | 3.085(15) | Rb2—O14 | 3.095(16) |
| Zn1—O5  | 1.940(16) | Zn1—O9  | 1.959(15) |
| Zn1—O11 | 2.909(15) | Zn1—O12 | 1.856(16) |
| Zn1—O13 | 1.827(22) | Zn2—O1  | 2.024(16) |
| Zn2—O5  | 2.972(15) | Zn2—O7  | 2.009(16) |
| Zn2—O8  | 1.965(17) | Zn2—O14 | 1.989(16) |
| Zn3—O2  | 1.869(16) | Zn3—O3  | 2.003(17) |

|        |           |         |           |
|--------|-----------|---------|-----------|
| Zn3—O6 | 2.044(15) | Zn3—O10 | 1.852(15) |
| P1—O1  | 1.403(17) | P1—O2   | 1.438(17) |
| P1—O3  | 1.520(19) | P1—O4   | 1.530(17) |
| P2—O4  | 1.611(17) | P2—O5   | 1.490(18) |
| P2—O6  | 1.495(18) | P2—O7   | 1.405(17) |
| P3—O8  | 1.516(24) | P3—O9   | 1.530(17) |
| P3—O10 | 1.569(16) | P3—O11  | 1.617(17) |
| P4—O11 | 1.630(17) | P4—O12  | 1.494(20) |
| P4—O13 | 1.572(23) | P4—O14  | 1.468(17) |

---

$x = 0.2$

---

|         |           |         |           |
|---------|-----------|---------|-----------|
| Rb1—O4  | 3.164(14) | Rb1—O8  | 2.945(19) |
| Rb1—O9  | 3.132(16) | Rb1—O9  | 3.200(14) |
| Rb1—O12 | 3.117(15) | Rb1—O12 | 3.185(15) |
| Rb1—O13 | 2.872(15) | Rb2—O1  | 3.125(15) |
| Rb2—O2  | 3.177(15) | Rb2—O3  | 2.910(15) |
| Rb2—O6  | 2.973(15) | Rb2—O7  | 3.123(16) |
| Rb2—O10 | 3.112(15) | Rb2—O14 | 3.097(14) |
| Zn1—O5  | 1.914(15) | Zn1—O9  | 1.958(15) |
| Zn1—O11 | 2.860(15) | Zn1—O12 | 1.846(15) |
| Zn1—O13 | 1.890(15) | Zn2—O1  | 2.002(14) |
| Zn2—O5  | 2.965(15) | Zn2—O7  | 1.966(15) |
| Zn2—O8  | 1.955(17) | Zn2—O14 | 1.960(15) |
| Zn3—O2  | 1.873(14) | Zn3—O3  | 1.980(15) |

---

|        |           |         |           |
|--------|-----------|---------|-----------|
| Zn3—O6 | 1.998(15) | Zn3—O10 | 1.807(15) |
| P1—O1  | 1.389(16) | P1—O2   | 1.446(16) |
| P1—O3  | 1.533(17) | P1—O4   | 1.553(17) |
| P2—O4  | 1.562(17) | P2—O5   | 1.516(17) |
| P2—O6  | 1.504(17) | P2—O7   | 1.435(17) |
| P3—O8  | 1.531(23) | P3—O9   | 1.550(16) |
| P3—O10 | 1.585(16) | P3—O11  | 1.618(16) |
| P4—O11 | 1.665(17) | P4—O12  | 1.526(16) |

|            |           |         |           |
|------------|-----------|---------|-----------|
| P4—O13     | 1.517(16) | P4—O14  | 1.494(16) |
| $x = 0.30$ |           |         |           |
| Rb1—O4     | 3.178(14) | Rb1—O8  | 2.975(19) |
| Rb1—O9     | 3.102(16) | Rb1—O9  | 3.191(14) |
| Rb1—O12    | 3.137(21) | Rb1—O12 | 3.177(17) |
| Rb1—O13    | 2.854(19) | Rb2—O1  | 3.128(15) |
| Rb2—O3     | 2.921(21) | Rb2—O6  | 2.986(15) |
| Rb2—O7     | 3.156(17) | Rb2—O10 | 3.174(15) |
| Rb2—O14    | 3.118(14) | Zn1—O5  | 1.896(16) |
| Zn1—O9     | 1.947(15) | Zn1—O11 | 2.880(15) |
| Zn1—O12    | 1.865(16) | Zn1—O13 | 1.822(16) |
| Zn2—O1     | 1.999(15) | Zn2—O5  | 3.007(15) |
| Zn2—O7     | 1.956(16) | Zn2—O8  | 1.948(17) |
| Zn2—O14    | 1.957(15) | Zn3—O2  | 1.891(16) |
| Zn3—O3     | 1.972(17) | Zn3—O6  | 1.974(15) |
| Zn3—O10    | 1.812(15) | P1—O1   | 1.416(17) |
| P1—O2      | 1.429(17) | P1—O3   | 1.517(19) |
| P1—O4      | 1.594(17) | P2—O4   | 1.521(17) |
| P2—O5      | 1.517(18) | P2—O6   | 1.479(17) |
| P2—O7      | 1.447(17) | P3—O8   | 1.513(23) |
| P3—O9      | 1.573(16) | P3—O10  | 1.527(16) |
| P3—O11     | 1.623(16) | P4—O11  | 1.655(17) |
| P4—O12     | 1.450(20) | P4—O13  | 1.613(23) |
| P4—O14     | 1.512(16) |         |           |
| $x = 0.5$  |           |         |           |
| Rb1—O4     | 3.161(16) | Rb1—O8  | 2.911(19) |
| Rb1—O9     | 3.166(16) | Rb1—O12 | 3.115(21) |
| Rb1—O13    | 2.837(18) | Rb2—O1  | 3.133(15) |
| Rb2—O2     | 3.181(15) | Rb2—O3  | 2.869(21) |
| Rb2—O6     | 2.878(19) | Rb2—O7  | 3.149(17) |
| Rb2—O10    | 3.157(15) | Rb2—O14 | 3.110(16) |

|         |           |         |           |
|---------|-----------|---------|-----------|
| Zn1—O5  | 1.965(16) | Zn1—O9  | 1.915(15) |
| Zn1—O11 | 2.914(15) | Zn1—O12 | 1.949(16) |
| Zn1—O13 | 1.951(21) | Zn2—O1  | 2.025(15) |
| Zn2—O5  | 2.916(15) | Zn2—O7  | 1.920(16) |
| Zn2—O8  | 2.019(17) | Zn2—O14 | 2.001(16) |
| <hr/>   |           |         |           |
| Zn3—O2  | 1.881(16) | Zn3—O3  | 2.020(17) |
| Zn3—O6  | 2.025(17) | Zn3—O10 | 1.843(15) |
| P1—O1   | 1.420(16) | P1—O2   | 1.449(17) |
| P1—O3   | 1.521(19) | P1—O4   | 1.549(17) |
| P2—O4   | 1.572(17) | P2—O5   | 1.475(18) |
| P2—O6   | 1.562(22) | P2—O7   | 1.473(17) |
| P3—O8   | 1.512(24) | P3—O9   | 1.578(17) |
| P3—O10  | 1.546(16) | P3—O11  | 1.618(17) |
| P4—O11  | 1.592(17) | P4—O12  | 1.424(20) |
| P4—O13  | 1.515(17) | P4—O14  | 1.454(17) |
| <hr/>   |           |         |           |

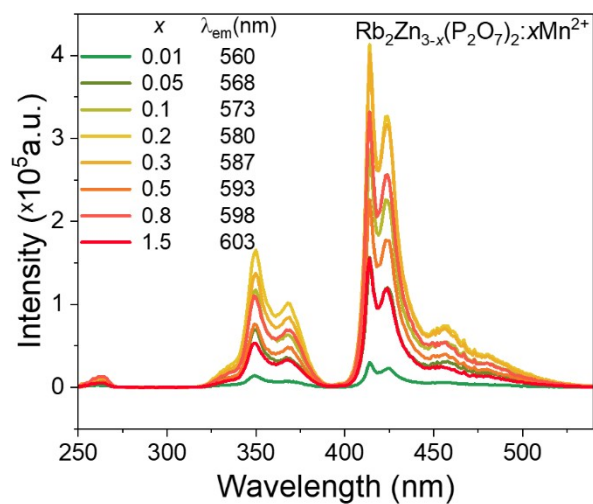

**Fig S2.** The PLE spectra of  $\text{Rb}_2\text{Zn}_{3-x}(\text{P}_2\text{O}_7)_2:\text{xMn}^{2+}$  ( $x = 0, 0.01, 0.05, 0.1, 0.2, 0.3, 0.5, 0.8, 1.5$ ) samples monitored at 560-603 nm.

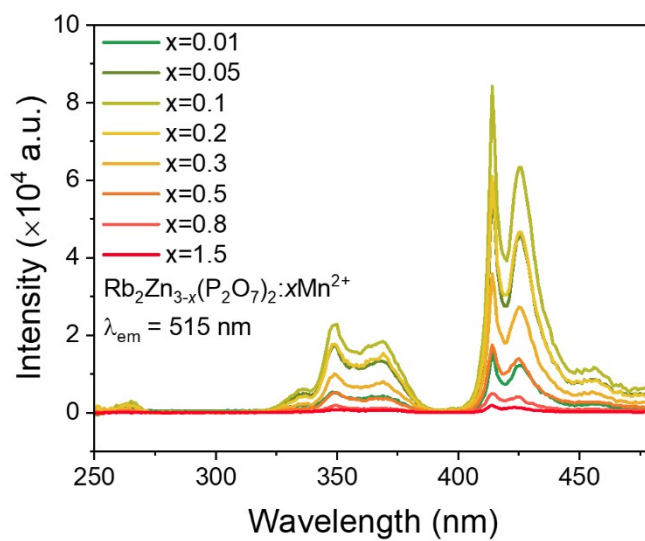

**Fig S3.** The PLE spectra of  $\text{Rb}_2\text{Zn}_{3-x}(\text{P}_2\text{O}_7)_2:\text{xMn}^{2+}$  ( $x = 0, 0.01, 0.05, 0.1, 0.2, 0.3, 0.5, 0.8, 1.5$ ) samples monitored at 515 nm.

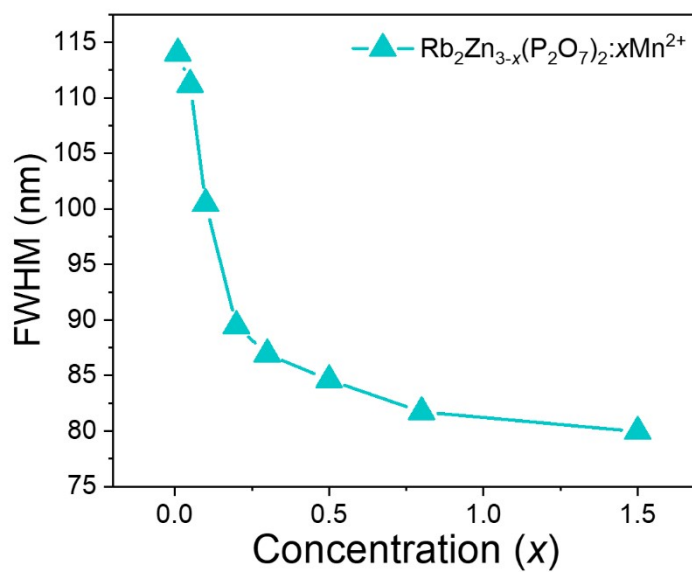

**Fig S4.** The full widths at half maximum (fwhms) of  $\text{Rb}_2\text{Zn}_{3-x}(\text{P}_2\text{O}_7)_2:x\text{Mn}^{2+}$  ( $x = 0, 0.01, 0.05, 0.1, 0.2, 0.3, 0.5, 0.8, 1.5$ ) samples.

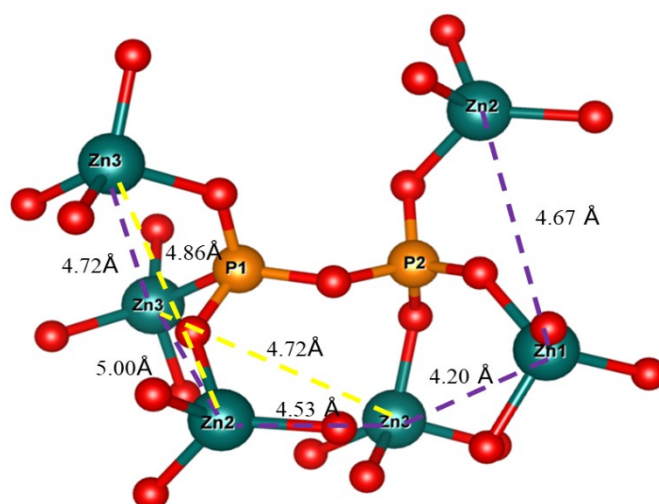

**Fig S5.** The local structure of  $[\text{Zn}_3(\text{P}_2\text{O}_7)_2]$  framework.
